# Supplementary material for: Basin-Scale Underway Quantitative Survey of Surface Microplankton Using Affordable Collection and Imaging Tools Deployed From Tara
Source: Frontiers journal article supplement (doi:10.3389/fmars.2022.916025), 2022-07-05
Supplement: Presentation_1.pdf [file Presentation_1.pdf]

## *Supplementary Material*

**Supplementary Table I.** Taxonomic content (179 taxa) of the nine microplanktonic taxo-functional groups defined for the analyses of surface micro-planktonic structure (Fig. 3, 4 and 5).

**Supplementary Table II.** Metadata per station for the 4 instrumental configurations: *Coryphaena* – FlowCam, *Coryphaena* - *PlanktoScope*, DN – FlowCam, DN – *PlanktoScope*. Vol net: total volume of water filtered by the net ( $\text{m}^3$ ), dilution factor: factor of dilution between vol collector and vol imaged, vol collector: total volume in the net cod-end ( $\text{m}^3$ ) and vol imaged: volume corresponding to the imaged portion ( $\text{m}^3$ ).

**Supplementary Table III.** Normalized Biomass Size Spectra (NBSS) values from 50 to 150 $\mu\text{m}$  per station for the 4 instrumental configurations: *Coryphaena* – FlowCam, *Coryphaena* - *PlanktoScope*, DN – FlowCam, DN – *PlanktoScope*. ESD correspond to the equivalent spherical diameter ( $\mu\text{m}$ ).

**Supplementary Table IV.** Single, homogeneous environmental database created from multiple sources; missing TSG and ACS data were first replaced by satellite data, then by Mercator model data. The source of each value is specified by a color code (orange for TSG, yellow for ACS, green for satellite and blue for Mercator).

**Supplementary Figure 1.** Images from the 3D model: design precision of the *Coryphaena* net.

**Supplementary Figure 2.** A few representative images are chosen from the two data sets; the black and white images are from FlowCam and the color ones from *PlanktoScope*. First row from left to right: Coscinodiscophyceae spp., Pleurosigma spp., Chaetoceros spp. Second row from left to right: Rhabdonella spp., Ceratocorys spp., Neoceratium spp. Third row from left to right: Hemialus spp., Copepoda spp., Amphibelone spp.

**Supplementary Figure 3.** Two vignettes from the *PlanktoScope* (from station 23) of a diatom cell of the genus *Hemiaulus* that contains its endosymbiont, the diazotrophic cyanobacterium *Richelia*.
