# Supplementary material for: Basin-Scale Underway Quantitative Survey of Surface Microplankton Using Affordable Collection and Imaging Tools Deployed From Tara
Source: Frontiers journal article supplement (doi:10.3389/fmars.2022.916025), 2022-07-05
Supplement: Table_1.XLSX [file Table_1.XLSX]

## Sheet: Feuil1
	copepoda	Copepoda		Ditylum		Oxytoxum
		Calanoida		Eucampia		Podolampas
		Calocalanus pavo		Hemiaulus		Protoperidinium
		Oithonidae		Lauderia		Amphisolenia
		Oithona		Odontella		Ornithocercus heteroporus
		Microsetella		Planktoniella sol		Ornithocercus quadratus
		Corycaeidae		Corethron		Neoceratium gravidum
		Oncaeidae		Dactyliosolen		Neoceratium limulus
		Copepoda_badfocus		Rhizosolenia		Dinophysis_Dinophysis caudata
	ciliophora	Ciliophora		Rhizosolenia inter. Richelia		Neoceratium arietinum
		Lacrymaria		pennate		Neoceratium contortum
		Dictyocysta		pennate_chain		Neoceratium macroceros
		Metacylis		Pleurosigma		Neoceratium massiliense
		Rhabdonella		Thalassionema nitzschioides		Neoceratium platycorne
		Tintinnida		Guinardia		Neoceratium ranipes
		Eutintinnus		Striatella		Neoceratium symmetricum
		Salpingella		Gossleriella		Neoceratium tripos
		Steenstrupiella		Climacodium		Ornithocercus steinii
		Poroecus		Thalassionematales		Neoceratium geniculatum
		Undellidae		Bleakeleya		Dinophyceae_cyst
		Cyttarocylis		darkrods		Neoceratium concilians
		Codonellopsis		lightrods		Neoceratium karstenii
		Epiplocylis		Chaetoceros protuberans		Neoceratium pulchellum
		Rhabdonellopsis		Chaetoceros peruvianus		Ornithocercus splendidus
		Amphorides		Neocalyptrella		Neoceratium inflatum
		Dadayiella		Odontella sp.	others large	polype
		Parundella		Chaetoceros danicus		Mollusca_veliger
		Zoothamniidae		Helicotheca		living_other_egg_egg sac
		Xystonellopsis		Proboscia		Mollusca
		Codonellidae		Asterionella glacialis	others small	Prymnesiophyceae
		Codonellopsis orthoceras	dinoflagellates	Dinophyceae		Coccolithaceae
		Helicostomella		Dinophyceae X		egg
		Xystonellopsis paradoxa		Dinophysis		cyst
	cyanobacteria	Trichodesmium_puff		Ornithocercus		cyst 1
		Cyanobacteria		Ornithocercus_Ornithocercus magnificus		Dictyochophyceae
		UCYNA like		Phalacroma	rhizaria	Rhizaria
	diatoms	Asterionellopsis glacialis		Gonyaulacales		Acantharea											’
		Coscinodiscophycidae		Neoceratium		Foraminifera
		Asterolamprales		Neoceratium candelabrum		Nassellaria
		Diatoma		Neoceratium furca		Spumellaria
		Diatoma_chainlarge		Neoceratium fusus		Amphibelone
		Diatoma_chainthin		Neoceratium pentagonum		Acantharia
		Diatoma_multiple		Ceratocorys		Cystidium
		Nitzschia		Cladopyxis	small grazers	Annelida_larvae
		Thalassionema		Pyrocystaceae		Cirripedia
		Bacteriastrum		Pyrophacus		nauplii
		Chaetoceros		Gymnodiniales		Bryozoa
		1.5
		2
		3
		3.5
