# Supplementary material for: Basin-Scale Underway Quantitative Survey of Surface Microplankton Using Affordable Collection and Imaging Tools Deployed From Tara
Source: Frontiers journal article supplement (doi:10.3389/fmars.2022.916025), 2022-07-05
Supplement: Table_2.XLSX [file Table_2.XLSX]

## Sheet: Feuil2
	date	lat start	lon start	lat end	lon end	time start (UTC)	time end (UTC)	Vol net (m3)	Dilution factor	Vol collector (m3)	Vol imaged (m3)	distance (km)	speed (knot)
Coryphaena FlowCam
station 2	20201226	42.6217	-10.9003	42.5917	-10.925	10:55:00	11:24:00	1.85552	0.75	0.0006	5.7835e-06	1.47658	3.18916
station 3	20201227	39.6503	-12.4008	39.625	-12.4067	12:50:00	12:57:00	3.59509	0.5	0.0004	5.7832e-06	2.86088	13.2407
station 5	20201229	34.2833	-15.3817	34.2075	-15.4017	10:15:00	10:49:00	2.8471	0.5	0.0004	5.7836e-06	1.47767	7.97879
station 11	20210109	13.8667	-27.2755	13.8423	-27.2758	12:10:00	12:22:00	1.37421	0.5	0.0004	2.8891e-06	1.09356	7.08573
station 13	20210111	7.61717	-26.4642	7.59733	-26.4617	11:42:00	11:52:00	2.6745	0.5	0.0004	2.9362e-06	2.1283	7.66126
station 14	20210112	4.63733	-26.2705	4.61567	-26.27	11:54:00	12:04:00	2.58853	1.25	0.0002	2.8899e-06	2.05989	5.13347
station 15	20210113	2.1765	-26.211	2.1585	-26.2075	09:36:00	09:45:00	2.57279	0.5	0.0004	2.8907e-06	2.04736	5.52743
station 16	20210114	-0.653333	-27.1013	-0.679333	-27.109	11:24:00	11:38:00	3.05825	0.571	0.00035	2.8896e-06	2.43368	7.16771
station 17	20210115	-3.3705	-28.2602	-3.41883	-28.2788	11:32:00	11:58:00	3.76372	1	0.0002	2.8893e-06	2.99507	6.9309
station 18	20210116	-6.037	-29.5517	-6.0725	-29.5743	11:51:00	12:16:00	3.06683	0.5	0.0004	2.8895e-06	2.4405	6.082
station 19	20210117	-8.491	-30.6247	-8.52383	-30.6438	12:56:00	13:16:00	4.8483	1	0.0002	2.8895e-06	3.85816	6.57865
station 20	20210118	-11.2993	-31.9842	-11.3107	-31.9883	12:26:00	12:31:00	4.80187	0.5	0.0004	2.8893e-06	3.82121	8.25315
station 21	20210119	-14.0982	-33.2603	-14.1628	-33.28	11:30:00	12:00:00	4.4009	1	0.0004	2.8916e-06	3.50213	8.10427
station 22	20210120	-16.7233	-34.5328	-16.7832	-34.5567	12:18:00	13:02:00	2.90172	1	0.0004	1.4457e-06	2.30912	4.98729
station 23	20210121	-18.9302	-36.1425	-18.9412	-36.1535	11:20:00	11:34:00	0.912862	1.25	0.0002	1.4464e-06	0.726433	3.92242
station 24	20210122	-21.6243	-38.2693	-21.6512	-38.2905	11:53:00	12:07:00	1.43251	0.5	0.0002	2.8908e-06	1.13996	7.38632
station 25	20210124	-26.6393	-42.4048	-26.6578	-42.4245	12:29:00	12:41:00	2.61493	0.5	0.0002	2.8895e-06	2.0809	7.49063
station 27	20210126	-31.8672	-46.8815	-31.9363	-46.9465	12:39:00	12:55:00	2.0702	0.75	0.0002	2.892e-06	1.64742	7.62457
station 28	20210127	-33.9487	-48.7865	-33.9992	-48.8305	12:54:00	13:19:00	3.4741	1	0.0002	2.9065e-06	2.7646	8.95659
station 29	20210129	-37.3242	-53.3623	-37.3697	-53.3805	12:36:00	13:02:00	5.11543	0.5	0.0002	2.8897e-06	4.07073	6.59406
station 30	20210130	-38.63	-55.87	-38.635	-55.9467	13:19:00	13:43:00	3.27472	1	0.0002	2.9194e-06	2.60594	8.44258
station 31	20210131	-40.4105	-58.9185	-40.4682	-58.951	13:05:00	13:42:00	2.73044	0.5	0.0002	2.8901e-06	2.17282	4.69291
station 32	20210201	-43.1452	-61.1635	-43.2025	-61.2107	12:38:00	13:11:00	5.49679	0.25	0.0004	2.8894e-06	4.3742	9.44753
station 33	20210202	-45.2598	-64.3212	-45.3177	-64.3457	10:32:00	11:00:00	8.50193	0.25	0.0004	2.8894e-06	7.06352	7.62799
station 34	20210203	-48.1313	-65.786	-48.2102	-65.848	13:02:00	13:46:00	5.39023	0.5	0.0002	2.8896e-06	4.28941	9.26439
station 35	20210204	-50.8833	-68.0167	-51.0175	-68.0753	13:36:00	14:34:00	4.92373	0.5	0.0002	2.8892e-06	3.91818	9.06707
Coryphaena PlanktoScope
station 2	20201226	42.6217	-10.9003	42.5917	-10.925	10:55:00	11:24:00	1.86	0.75	0.0006	5.54861e-06	1.47658	3.18916
station 3	20201227	39.6503	-12.4008	39.625	-12.4067	12:50:00	12:57:00	3.6	0.5	0.0004	5.54861e-06	2.86088	13.2407
station 5	20201229	34.2833	-15.3817	34.2075	-15.4017	10:15:00	10:49:00	1.86	0.5	0.0004	5.54861e-06	1.47767	7.97879
station 6	20201230	31.3667	-16.5933	31.3317	-16.6133	10:10:00	10:39:00	1.02	0.5	0.0004	5.54861e-06	0.812896	2.63357
station 7	20201231	28.4767	-17.815	28.46	-17.8283	12:47:00	13:38:00	2.85	0.5	0.0004	3.69907e-06	2.26565	1.43924
station 8	20210102	23.8507	-20.7308	23.7112	-20.8167	13:29:00	14:55:00	1.72	0.5	0.0004	5.54861e-06	1.36653	5.53401
station 9	20210103	21.6263	-22.2378	21.609	-22.2495	10:30:00	12:05:00	2.83	0.714	0.0004	5.54861e-06	2.2538	8.11301
station 11	20210109	13.8667	-27.2755	13.8423	-27.2758	12:10:00	12:22:00	1.37	0.5	0.0004	2.7743e-06	1.09356	7.08573
station 12	20210110	10.7217	-26.8817	10.6683	-26.8788	11:40:00	11:45:00	7.46	1	0.0002	2.7743e-06	5.93847	NaN
station 13	20210111	7.61717	-26.4642	7.59733	-26.4617	11:42:00	11:52:00	2.67	0.5	0.0004	2.7743e-06	2.1283	7.66126
station 14	20210112	4.63733	-26.2705	4.61567	-26.27	11:54:00	12:04:00	2.59	1	0.0002	2.7743e-06	1.76097	1.09713
station 15	20210113	2.1765	-26.211	2.1585	-26.2075	09:36:00	09:45:00	2.11	1	0.0002	2.7743e-06	1.6758	6.78643
station 16	20210114	-0.653333	-27.1013	-0.679333	-27.109	11:24:00	11:38:00	3.06	0.571429	0.00035	2.7743e-06	2.43368	7.16771
station 17	20210115	-3.3705	-28.2602	-3.41883	-28.2788	11:32:00	11:58:00	3.76	1	0.0002	2.778e-06	2.99507	6.9309
station 18	20210116	-6.037	-29.5517	-6.0725	-29.5743	11:51:00	12:16:00	3.07	0.5	0.0004	7.39814e-08	2.4405	6.082
station 19	20210117	-8.491	-30.6247	-8.52383	-30.6438	12:56:00	13:16:00	4.85	1	0.0002	3.69907e-06	3.85816	6.57865
station 20	20210118	-11.2993	-31.9842	-11.3107	-31.9883	12:26:00	12:31:00	4.8	0.5	0.0004	3.69907e-06	3.82121	8.25315
station 21	20210119	-14.0982	-33.2603	-14.1628	-33.28	11:30:00	12:00:00	4.4	1	0.0004	3.69907e-06	3.50213	8.10427
station 22	20210120	-16.7233	-34.5328	-16.7832	-34.5567	12:18:00	13:02:00	5.98	1	0.0004	1.84954e-06	2.30912	4.98729
station 24	20210122	-21.6243	-38.2693	-21.6512	-38.2905	11:53:00	12:07:00	1.43	0.5	0.0002	2.7743e-06	1.13996	7.38632
station 25	20210124	-26.6393	-42.4048	-26.6578	-42.4245	12:29:00	12:41:00	2.61	0.5	0.0002	2.7743e-06	2.0809	7.49063
station 26	20210125	-29.3318	-44.709	-29.3818	-44.7512	12:42:00	13:09:00	4.36	0.5	0.0002	2.7743e-06	3.46991	8.02972
station 27	20210126	-31.8672	-46.8815	-31.9363	-46.9465	12:39:00	12:55:00	2.07	0.75	0.0002	2.7743e-06	1.64742	7.62457
station 28	20210127	-33.9487	-48.7865	-33.9992	-48.8305	12:54:00	13:19:00	3.47	1	0.0002	2.7743e-06	2.7646	8.95659
station 29	20210129	-37.3242	-53.3623	-37.3697	-53.3805	12:36:00	13:02:00	5.12	0.5	0.0002	2.7743e-06	4.07073	6.59406
station 30	20210130	-38.63	-55.87	-38.635	-55.9467	13:19:00	13:43:00	2.59	1	0.0002	1.84954e-06	2.06036	8.34381
station 33	20210202	-45.2598	-64.3212	-45.3177	-64.3457	10:32:00	11:00:00	8.88	0.25	0.0004	5.54861e-07	7.06352	7.62799
station 34	20210203	-45.2598	-64.3212	-45.3177	-64.3457	10:32:00	11:00:00	3	0.5	0.0002	1.10972e-06	2.38379	5.14857
station 35	20210204	-50.8833	-68.0167	-51.0175	-68.0753	13:36:00	14:34:00	4.53	0.5	0.0002	7.39814e-07	3.60781	7.79225
DN FlowCam
station 2	20201226	42.6217	-10.9003	42.5917	-10.925	10:55:00	11:24:00	2	0.75	0.0006	5.7799e-06
station 4	20201228	36.429	-13.1392	36.3483	-13.1933	10:00:00	10:39:00	1.98	0.5	0.0004	5.7822e-06
station 5	20201229	34.2833	-15.3817	34.2075	-15.4017	10:15:00	10:49:00	2	0.5	0.0004	5.781e-06
station 6	20201230	31.3667	-16.5933	31.3317	-16.6133	10:10:00	10:39:00	2	0.5	0.0004	5.7826e-06
station 11	20210109	13.8667	-27.2755	13.8423	-27.2758	12:10:00	12:22:00	0.5	0.4	0.0005	2.8914e-06
station 13	20210111	7.61717	-26.4642	7.59733	-26.4617	11:42:00	11:52:00	0.7	0.4	0.0005	1.4451e-06
station 14	20210112	4.63733	-26.2705	4.61567	-26.27	11:54:00	12:04:00	0.55	0.333333	0.0006	2.9178e-06
station 15	20210113	2.1765	-26.211	2.1585	-26.2075	09:36:00	09:45:00	0.63	0.333333	0.0006	2.8906e-06
station 16	20210114	-0.653333	-27.1013	-0.679333	-27.109	11:24:00	11:38:00	0.62	0.444	0.00045	2.899e-06
station 17	20210115	-3.3705	-28.2602	-3.41883	-28.2788	11:32:00	11:58:00	1.2	0.5	0.0004	2.8935e-06
station 18	20210116	-6.037	-29.5517	-6.0725	-29.5743	11:51:00	12:16:00	1	0.5	0.0004	2.89e-06
station 19	20210117	-8.491	-30.6247	-8.52383	-30.6438	12:56:00	13:16:00	1	0.5	0.0004	2.8894e-06
station 20	20210118	-11.2993	-31.9842	-11.3107	-31.9883	12:26:00	12:31:00	1.3	0.333333	0.0004	2.8954e-06
station 21	20210119	-14.0982	-33.2603	-14.1628	-33.28	11:30:00	12:00:00	1.1	0.15	0.0004	2.8892e-06
station 22	20210120	-16.7233	-34.5328	-16.7832	-34.5567	12:18:00	13:02:00	1.1	0.667	0.0004	1.4449e-06
station 23	20210121	-18.9302	-36.1425	-18.9412	-36.1535	11:20:00	11:34:00	0.5	1.25	0.0004	1.4447e-06
station 24	20210122	-21.6243	-38.2693	-21.6512	-38.2905	11:53:00	12:07:00	0.5	0.1667	0.0006	2.8906e-06
station 25	20210124	-26.6393	-42.4048	-26.6578	-42.4245	12:29:00	12:41:00	0.5	0.167	0.0006	2.8892e-06
station 27	20210126	-31.8672	-46.8815	-31.9363	-46.9465	12:39:00	12:55:00	1.3	0.1	0.001	2.8906e-06
station 28	20210127	-33.9487	-48.7865	-33.9992	-48.8305	12:54:00	13:19:00	1.1	0.167	0.0006	2.0227e-06
station 29	20210129	-37.3242	-53.3623	-37.3697	-53.3805	12:36:00	13:02:00	1	0.167	0.0006	1.4445e-06
station 31	20210131	-40.4105	-58.9185	-40.4682	-58.951	13:05:00	13:42:00	1.4	0.5	0.0004	2.8961e-06
station 32	20210201	-43.1452	-61.1635	-43.2025	-61.2107	12:38:00	13:11:00	1	0.25	0.0004	1.451e-06
station 33	20210202	-45.2598	-64.3212	-45.3177	-64.3457	10:32:00	11:00:00	1	0.25	0.0004	2.8901e-06
station 34	20210203	-48.1313	-65.786	-48.2102	-65.848	13:02:00	13:46:00	1.6	1	0.0008	1.4442e-06
DN PlanktoScope
station 1	20201221	48.1045	-4.3167	NaN	NaN	11:11:00	12:12:00	1.99	0.667	0.0005	5.54861e-06
station 6	20201230	31.3667	-16.5933	31.3317	-16.6133	10:10:00	10:39:00	2	0.5	0.0004	5.54861e-06
station 8	20200102	23.8507	-20.7308	23.7112	-20.8167	13:29:00	14:55:00	3.97	0.5	0.0004	5.54861e-06
station 9	20210103	21.6263	-22.2378	21.609	-22.2495	10:30:00	12:05:00	3.9	0.714	0.0004	5.54861e-06
station 10	20210104	19.1773	-23.7302	18.7563	-23.964	13:28:00	16:59:00	1.85	0.25	0.0004	1.84954e-06
station 11	20210109	13.8667	-27.2755	13.8423	-27.2758	12:10:00	12:22:00	0.5	0.4	0.0005	2.7743e-06
station 13	20210111	7.61717	-26.4642	7.59733	-26.4617	11:42:00	11:52:00	0.7	0.4	0.0005	2.7743e-06
station 14	20210112	4.63733	-26.2705	4.61567	-26.27	11:54:00	12:04:00	0.55	0.333333	0.0006	2.7743e-06
station 16	20210114	-0.653333	-27.1013	-0.679333	-27.109	11:24:00	11:38:00	0.62	0.444444	0.00045	2.7743e-06
station 17	20210115	-3.3705	-28.2602	-3.41883	-28.2788	11:32:00	11:58:00	1.2	0.5	0.0004	2.7743e-06
station 18	20210116	-6.037	-29.5517	-6.0725	-29.5743	11:51:00	12:16:00	1	0.5	0.0004	1.10972e-07
station 19	20210117	-8.491	-30.6247	-8.52383	-30.6438	12:56:00	13:16:00	1	0.5	0.0004	3.69907e-06
station 20	20210118	-11.2993	-31.9842	-11.3107	-31.9883	12:26:00	12:31:00	1.3	0.333	0.0004	3.69907e-06
station 24	20210122	-21.6243	-38.2693	-21.6512	-38.2905	11:53:00	12:07:00	5.32	0.1667	0.0006	2.7743e-06
station 25	20210124	-26.6393	-42.4048	-26.6578	-42.4245	12:29:00	12:41:00	0.5	0.167	0.0006	2.7743e-06
station 26	20210125	-29.3318	-44.709	-29.3818	-44.7512	12:42:00	13:09:00	1.1	0.188	0.0008	1.84954e-06
station 27	20210126	-31.8672	-46.8815	-31.9363	-46.9465	12:39:00	12:55:00	1.3	0.1	0.0001	1.84954e-06
station 28	20210127	-33.9487	-48.7865	-33.9992	-48.8305	12:54:00	13:19:00	1.1	0.1667	0.0006	1.84954e-06
station 29	20210129	-37.3242	-53.3623	-37.3697	-53.3805	12:36:00	13:02:00	1	0.1667	0.0006	1.84954e-06
station 31	20210131	-40.4105	-58.9185	-40.4682	-58.951	13:05:00	13:42:00	1.4	0.5	0.0004	1.10972e-06
station 33	20210202	-45.2598	-64.3212	-45.3177	-64.3457	10:32:00	11:00:00	1	0.25	0.0004	5.54861e-07
station 35	20210204	-50.8833	-68.0167	-51.0175	-68.0753	13:36:00	14:34:00	1.8	0.167	0.0006	7.39814e-07
