# Supplementary material for: Basin-Scale Underway Quantitative Survey of Surface Microplankton Using Affordable Collection and Imaging Tools Deployed From Tara
Source: Frontiers journal article supplement (doi:10.3389/fmars.2022.916025), 2022-07-05
Supplement: Table_3.XLSX [file Table_3.XLSX]

## Sheet: Feuil1
Coryphaena FlowCam
ESD (µm)	station 2	station 3	station 5	station 11	station 13	station 14	station 15	station 16	station 17	station 18	station 19	station 20	station 21	station 22	station 23	station 24	station 25	station 27	station 28	station 29	station 30	station 31	station 32	station 33	station 34	station 35
51.8963	8160.21	1643.57	760.622	26045.4	6005.05	25763.9	2937.73	2811.54	4159.14	1592.4	726.388	669.692	1109.34	6328.09	265996	12459.1	155.45	296.791	336.598	1408.07	371.127	217.57	179.641	46.0348	1020.25	122.694
54.9822	10936.8	1365.59	874.998	25988.5	7171.05	23465.6	2713.9	3664.67	4309.6	1444.36	743.125	743.745	879.344	7172.07	206945	12094.7	0	716.116	227.372	1277.79	241.274	214.411	145.11	70.0456	893.802	117.328
58.2517	10073.8	1430.96	842.688	25407.8	7652.31	23797.5	4237.58	3030.5	5331.47	1731.92	986.206	491.837	1091.71	7439.45	140178	12132.3	294.423	291.791	216.379	1052.1	0	146.626	214.039	25.456	687.56	43.4915
61.7155	12991.7	1665.4	784.205	20379.4	6362.56	20564.5	5638.89	2040.04	6966.8	2045.26	836.441	827.163	1641.1	5626.23	124618	10987.8	150.03	275.741	351.031	825.231	476.133	0	36.3913	0	450.681	0
65.3853	17584.2	2795.21	1178.98	24380.1	8586.5	24655.4	3867.62	2715.99	4329.2	2246.31	332.74	942.808	1819.68	5339.91	111425	15024.5	82.9066	141.005	234.666	631.594	236.367	77.105	0	0	622.099	81.5458
69.2733	21883.7	2928.82	1332.23	19283.9	7164.02	24583.5	3057	1556.62	4436.43	908.59	921.117	841.308	1105.82	5040.11	107309	11943.3	0	0	220.759	623.35	235.538	0	0	0	183.224	120.029
73.3925	25154.4	2706.95	1539.05	18310.9	6924.49	16083.7	3199.43	1181.72	2115.73	1069.51	244.35	492.268	530.211	2106.02	68434.8	11630.6	77.6689	0	109.794	581.057	118.359	68.2971	74.3976	25.395	176.513	0
77.7566	23028.2	2543.54	920.669	17645.6	6143.37	17360.3	2035.04	1652.69	2446.36	1564.62	747.488	853.373	1629.37	4203.29	46132.3	13123	164.043	141.184	234.952	390.557	0	151.751	34.9892	89.3801	143.755	42.2839
82.3803	14255.9	1609.16	1065.7	15447.8	5911.39	18564.3	1891.05	1202.38	2567.89	1956.84	757.046	512.823	1103.04	1877.09	39611.1	10856.4	0	134.707	110.278	472.411	0	143.906	0	23.914	108.803	0
87.2789	8699.69	1822.12	1330.02	15254.1	7057.23	19697.8	2033.23	3653.38	3543.27	1962.07	494.591	1167.53	1097.15	2928.89	37973.1	9607.31	143.82	299.205	124.048	511.684	0	0	70.6764	25.1933	224.153	0
92.4688	10311.7	1953.39	1338.74	12831.6	4888.77	21351.6	1855.59	1714.7	3172.87	253.287	662.559	594.66	1450.54	2645.89	36457.8	11327.8	0	0	0	668.084	0	78.4078	108.3	24.5824	35.8472	75.7576
97.9672	6063.05	1239.16	1207.92	11476.8	4862.21	15267.2	1855.07	1671.7	2133.94	776.946	326.496	424.074	714.752	2355.61	38789.5	7838.05	0	0	234.422	532.052	0	75.4027	37.3791	0	37.2402	0
103.793	6096.22	1631.84	1316.61	7557.88	5602.02	6148.43	1381.38	521.538	2201.92	670.454	421.493	681.273	905.692	1045.23	27708.4	8004.99	73.8522	0	105.829	502.784	128.068	147.156	35.4205	0	39.9515	0
109.964	3964.99	1223.58	645.33	9283.15	2906.45	5207.61	161.594	631.421	2085.76	1053.81	557.525	988.156	374.312	1328.73	22796.2	5523.56	149.026	150.705	0	389.22	0	77.9456	35.9262	0	38.0483	0
116.503	7778.08	1447.35	774.584	9246.8	3260.64	3673.02	621.331	510.937	427.807	785.178	167.165	569.191	727.687	1897.59	17661.1	4027.27	0	156.153	237.262	196.653	113.142	232.396	0	0	0	0
123.431	6531.7	1226.06	1254.85	6058.27	2992.71	3457.58	743.941	900.038	838.408	1018.79	250.563	670.613	1127.14	537.604	15272.8	3360.58	0	0	0	231.726	121.872	0	0	0	39.3239	0
130.771	2351.8	1151.04	786.044	3527.58	2094.79	2611.63	150.92	651.709	970.852	1094.87	410.745	347.811	344.388	791.615	9789.31	2778.49	0	0	0	194.872	119.119	296.923	38.0287	0	0	0
138.547	4062.75	981.925	893.09	2652.68	1014.58	755.4	944.961	257.137	1587.79	395.53	87.7856	1005.16	1062.28	264.406	5453.31	849.606	0	0	0	37.3146	110.606	0	0	0	0	0
146.785	3134.29	1318.19	769.582	2593.09	890.374	1679.87	799.057	510.283	1173.41	399.13	0	472.183	545.593	532.397	5364.57	549.174	0	0	0	0	0	223.376	0	0	0	0
Coryphaena PlanktoScope
ESD (µm)	station 2	station 3	station 5	station 6	station 7	station 8	station 9	station 11	station 12	station 13	station 14	station 15	station 16	station 17	station 18	station 19	station 20	station 21	station 22	station 24	station 25	station 26	station 27	station 28	station 29	station 30	station 33	station 34	station 35
51.8963	4839.5	1155.95	785.715	2019.04	1519.19	967.908	524.117	18507.4	2608.4	5275.9	6016.12	975.548	2704.92	1306.25	0	455.216	138.993	1266.43	16792.2	1581.74	232.898	1033.4	1511.41	471.259	236.754	3353.68	117.286	0	0
54.9822	4491.81	1136.51	1469.66	1688.31	1392.49	1289.5	304.301	18307.1	3674.72	6006.53	5208.59	583.552	2302.49	1752.05	0	376.072	522.266	140.012	17249.2	3761.01	0	427.373	442.552	112.604	199.886	248.384	0	0	0
58.2517	3542.36	1214.11	776.047	1462.24	986.487	1553.03	723.897	15774.6	3017.95	7053.48	5569.51	981.652	1919.57	2040.16	0	723.626	715.905	418.187	13890	3480.56	243.584	478.793	1615.81	235.813	159.815	467.733	0	351.315	0
61.7155	2943.36	1384.48	808.657	2559.57	2002.77	1195.88	635.142	13758.3	3049.23	6747.94	5017.25	204.727	2413.03	2321.73	0	639.103	201.355	421.251	7501.18	3210.31	246.625	487.477	607.21	232.022	204.747	0	111.827	0	0
65.3853	5279.54	1204.98	1136.26	2171.24	1193.28	1704.55	545.28	18125.4	2868.14	6756.39	5975.86	1980.72	2415.85	2753.38	0	637.055	386.504	1682.45	10327.4	3761.7	0	567.836	910.96	370.283	37.6616	723.211	0	0	0
69.2733	6791.41	1167.09	1549.77	1620.43	1532.82	1104.29	765.899	17355.7	4022.26	5994.42	7387.28	591.013	2788.36	4709.99	5248.02	899.672	266.23	1260.81	6588.32	6032.66	248.495	288.771	304.86	382.838	192.632	482.012	0	0	0
73.3925	9557.45	1440.25	2016.25	2265.89	1626.04	1404.35	749.177	16672	3982.71	8467.13	6593.93	1575.88	3109.74	3422.94	0	1115.33	462.235	1127.93	5021.1	8772.73	74.0331	329.048	428.227	113.156	82.0954	480.345	126.877	0	0
77.7566	10286.8	1562.54	1874.19	1204.82	1847.81	922.902	97.2216	14670	3827.68	8569.33	6688.51	1182.96	3130.73	3642.52	5360.71	723.761	631.136	1129.27	3177.84	7840.07	74.3612	183.305	431.023	230.871	236.967	1226	0	0	0
82.3803	9151.8	2142.84	2544.56	2821.39	772.376	1653	525.124	16383.9	4027.12	7450.06	7700.9	977.491	1603.62	3907.16	0	1106.96	583.82	1092.04	3365.04	8411.65	0	331.428	290.49	116.616	204.529	262.34	0	0	0
87.2789	8044.04	2022.35	2451.89	2470.09	1198.68	1237.39	620.073	17191.6	4302.25	8528.42	7817.63	1568.52	1864.2	3148.42	0	656.311	373.88	0	3145.58	9615.09	78.7434	193.347	296.658	470.043	43.5109	480.275	0	0	0
92.4688	5545.03	1453.08	1810.52	1254.97	1092.09	712.328	974.267	19242.7	3938.97	6389.7	8112.09	1773.55	1075.23	2321.7	0	716.247	514.881	708.766	2098.9	12027.4	78.7004	151.521	146.374	230.924	42.2316	237.122	0	0	0
97.9672	5347.28	1806.47	3036.02	2047.12	548.544	504.386	743.317	12482.7	4156.78	8471.49	7292.25	1975.27	1056.86	1209.23	0	576.385	583.117	847.694	3739.27	10526.6	0	191.158	0	0	123.519	1207.07	0	0	0
103.793	6105.71	1190.74	2390.47	1218.32	854.731	376.351	415.579	11409.7	4280.09	8252.88	9914.8	2297.42	1665.31	2264.67	0	939.721	519.811	0	1917.19	10582.9	146.773	45.0622	159.298	355.511	212.585	469.265	0	0	0
109.964	4506.37	1549.33	2324.97	1682.16	962.681	130.658	203.044	13629.1	3751.17	7067.07	9502.29	1133.97	2320.58	2560.23	0	449.079	324.624	430.59	1094.59	11459.7	74.2506	145.263	444.958	0	163.327	0	0	0	0
116.503	5274.26	1102.48	1685.03	2035.62	1216.82	842.043	605.496	11354.2	3198.89	5516.82	6792.65	777.332	940.292	1847.8	0	385.183	782.459	439.09	1636	12489.7	83.4213	241.685	290.909	122.509	0	238.632	0	0	0
123.431	2779.14	1043.48	1412.64	1385.87	439.443	129.412	206.624	14777.8	3448.72	5401.76	3331.76	390.99	1329.84	1773.85	0	451.123	732.836	448.532	1235.88	11051	0	137.404	0	0	38.8753	1747.31	0	0	0
130.771	2302.44	629.015	1672.38	619.801	1086.22	595.025	395.271	6059.81	3664.54	4822.89	2748.24	615.548	543.798	2160.06	0	373.776	1129.98	152.554	1662.9	9576.36	0	49.1354	159.128	0	43.3201	712.741	0	0	0
138.547	2769.31	465.231	1437.69	1233.82	1123.15	862.384	110.969	8428.06	2536.63	4342.22	3141.41	0	688.624	1198.68	0	191.978	525.02	283.722	1210.92	8017.3	0	141.455	0	0	44.0933	241.477	113.618	0	0
146.785	3986.52	816.69	1836.76	1009.07	1633.41	1582.24	224.805	8161.86	1757.49	3293.68	2414.84	397.818	813.842	541.251	0	259.415	511.034	411.564	1043.75	7298.95	0	147.119	0	0	124.188	1207.86	0	0	0
DN FlowCam
ESD (µm)	station 2	station 4	station 5	station 6	station 11	station 13	station 14	station 15	station 16	station 17	station 18	station 19	station 20	station 21	station 22	station 23	station 24	station 25	station 27	station 28	station 29	station 31	station 32	station 33	station 34
51.8963	1084.49	302.489	412.736	0	83828.2	53420.1	51553.4	21745.3	15387.2	18524.4	8863.76	10019.1	9400.69	1409.72	478558	2.12889e+06	48807.7	18311.8	13999.6	40805.8	54539.5	7956.84	20768.5	17911.2	35895.8
54.9822	1097.54	698.34	0	397.62	83574.1	49803.8	44030.7	29772.3	8934.71	16147.6	11493.3	8684.16	5748.75	2056.78	340006	1.40835e+06	44582.1	15418.6	13042.7	31981.8	44344.6	5676.99	18584.3	13430.4	22004.8
58.2517	889.991	399.902	706.005	205.486	85448.2	43353.9	32925.8	21901.5	12872.5	21916.1	7602.54	7875.38	3635.2	1183.98	228012	962677	40005.3	12153.9	10515	29589.3	37331.7	2902.29	9101.97	6025.56	31614.7
61.7155	1134.6	1011.67	294.574	201.148	82381.2	44892.5	36773.2	26048	12611.1	24273.8	10416.2	7710.12	3575.12	952.334	141906	853911	45099.2	14084.5	12027.8	31782.6	33611.1	835.932	5605.14	4812.01	18013.2
65.3853	651.962	520.733	695.386	101.696	58936.6	23189.3	34194.5	24003.4	9783.45	25703.3	10792.4	5220.35	2677.93	665.009	95839.9	674511	46754	8799.45	11067	18260.2	26176.2	1402.5	3247.2	2751.42	10002
69.2733	428.566	96.3904	299.247	289.532	64479	26758.4	21737.6	8238.36	10666	7239.01	6717.97	5284.22	2820.75	761.064	81380	677075	34845.4	7891.56	4795.95	14834.6	19327.3	1384.67	1509.65	1979.79	4144.71
73.3925	1147.02	603.858	197.376	201.259	66555	28683.7	12804.6	5705.23	5018.42	6180.65	3665.86	3237.58	1629.3	113.451	64511.1	392571	32469.8	3573.15	3911.33	10634.9	14037.1	0	2400.89	770.061	7914.44
77.7566	955.759	701.29	196.151	498.75	52790.8	26935.2	14428.5	5024.32	1970.65	2665.15	1941.5	5034.14	1824.03	775.087	34510.4	216605	38096.3	5292.48	3526.6	6422.31	10124.7	0	2351.76	3054.45	7806.14
82.3803	684.914	383.797	597.297	315.074	45693.2	20025.2	20925.6	6222.76	4456.81	3685.35	2353.32	4343.64	2213.79	531.774	23111.1	72595.1	41896.8	3966.02	3386.98	10118.5	12840.1	0	2784.75	581.955	2109.55
87.2789	206.702	313.99	580.58	292.182	37456.2	17878.1	26087.7	5093.01	4492.4	4247.96	3964.5	5477.35	1256.29	220.77	17258.4	124647	27031.3	2366.21	3815.82	8560.76	5994.55	2619.92	9294.14	4816.82	12278.8
92.4688	448.728	200.28	600.384	96.5557	24108.4	16910.5	16830.2	4475.68	1231.35	2375.93	1645.89	2415.24	1638.2	632.504	13264.2	86760.1	33735.2	3658.43	3669.69	6758.34	5556.66	2879.87	15986.2	3993.86	4063.36
97.9672	235.47	387.546	393.476	192.08	31875.4	17051.6	16978.1	3100.08	1835.25	7260.03	424.796	1951.51	1606.92	213.375	15361.5	67273.9	28268.5	835.254	3663.37	4693.21	3617.18	1677.06	6794.28	5772.96	2066.05
103.793	0	100.196	202.671	98.1619	30434.7	14448.6	9257.47	2002.9	3221.14	3216.36	814.253	1185.58	1246.11	211.591	9894.89	63460.2	31555.4	2353.75	2800.6	6523.84	5204.68	3103.25	5907.14	2177.9	0
109.964	238.177	307.456	400.976	309.524	24572.4	9094.73	6540.45	2568.04	2500.25	2289.69	1181.19	1550.37	1007.94	335.158	8386.64	28033.6	29498.6	3190.34	1217.96	2847.48	2865.68	3687.16	3961.32	612.012	2015.85
116.503	655.161	199.638	0	206.165	15585.6	16690.5	2210.27	651.002	0	1994.23	1184.39	2444.77	1457.83	433.782	6753.56	27338.8	15297.2	1612.05	1547.95	4624.25	789.929	7785.58	8344.51	980.538	0
123.431	233.766	191.259	512.211	0	8675.26	8059.75	1445.77	3069.6	1286.21	1321.77	1183.94	3180.44	1004.02	649.935	10600.3	27513	17523.2	2787.47	2301	3307.76	4378.82	3727.69	4343.77	1576.1	0
130.771	0	298.951	103.801	0	8101.44	6978.28	2103.2	1300.46	1253.88	1708.71	830.453	419.126	394.451	427.731	4920.49	4033.98	9592.24	419.012	1562.11	2332.04	2424.95	5688	4033.62	1030.34	0
138.547	0	188.271	295.421	105.73	7291.2	6863.9	780.718	1310.81	1334.4	1991.98	1255.08	1605.42	413.847	549.303	7743.94	27698.2	4733.33	1139.75	2099.67	1263.75	0	2308.36	2012.19	1000.03	0
146.785	458.056	105.582	0	0	3910.71	1197.69	704.892	640.103	1307.33	1328.79	372.515	1562.75	0	421.178	5770.99	7757.14	5932.79	0	451.978	1062.36	2002.63	2529.27	3177.05	606.04	0
DN PlanktoScope
ESD (µm)	station 1	station 6	station 8	station 9	station 10	station 11	station 13	station 14	station 16	station 17	station 18	station 19	station 20	station 24	station 25	station 26	station 27	station 28	station 29	station 31	station 33	station 35
51.8963	9449.41	654.846	101.651	0	0	72375.1	82342.6	65721.8	23969.3	18681	20317.7	13306	9360.68	4110.89	27045.2	31624.6	3552.33	69245.5	178230	13345.6	138953	3015.63
54.9822	7282.14	412.318	218.143	302.508	181.56	67193	67332.6	56016.9	21950	19811	9864.95	14615.5	8257.09	3967.78	24615.3	22685.3	3381.28	56051.6	148879	22130.2	77908.6	1712.27
58.2517	7283.35	315.632	52.3278	75.2107	0	83983.9	74813.9	42271.5	18803.1	18982.5	11222.2	8078.17	9712.1	4335.2	27498.2	25221	2844.45	61041.7	142650	11095	27697.8	1757.58
61.7155	6979.88	317.764	101.222	77.2753	506.172	79181.1	63911.2	38644	24415	16498.4	20954.5	8441.65	8088.11	3722.96	23854.8	24122.4	3030.89	57565.5	106276	8746.39	12259.7	1680.14
65.3853	3681.16	321.707	102.674	165.526	155.027	65964.7	54664.5	36487.5	22850.4	13718.4	0	8480.81	6277.64	3445.96	25998.3	16478.1	2529.08	49010.2	100015	777.448	7352.78	1333.74
69.2733	4726.42	100.627	0	149.088	509.581	74987	52954.7	37010.7	23490.6	16639.8	0	5631.69	4466.69	3630.75	17142	17849.1	2096.48	48907	86485.4	6534.22	3199.1	0
73.3925	4209.62	417.276	165.583	80.5745	0	61773.4	53834.5	42186	22100.3	9650.02	0	5576.97	3059.54	3194.21	13711.8	13503.5	1779.24	39380.9	71881.7	3048.98	2187.48	0
77.7566	4604.51	322.023	0	0	180.743	59123.8	52264.5	38525	17434.2	18407.6	21022.9	3399.2	3935.04	3246.02	9086.4	6714.32	1531.51	36097.4	52861.1	0	1009.81	0
82.3803	3364.65	330.335	53.9709	69.9634	163.533	63496.9	49442	33231.8	9173.2	17785.4	10589.4	5284.83	1923.83	2906.39	9785.77	11777.1	1142.89	27602.9	54906.1	1581.3	4313.75	0
87.2789	3329.15	522.156	0	71.2782	0	58141	43310	23909.3	11287	8895.11	0	3703.43	1615.81	2389.09	8414.05	8533.46	1149.83	22601.1	42490.1	0	991.23	406.368
92.4688	2414.69	415.033	0	242.134	163.185	49703.5	32939	12004.1	3322.99	3398.89	9621.01	5320.04	1722.22	3162.48	7823.72	8121.18	956.702	23225.9	37404.4	1587.17	0	459.05
97.9672	1745.66	630.221	0	0	0	66543.2	35363.7	24774.7	4578.07	6228.19	0	2208.44	659.696	3171.21	2469.17	8266.04	640.207	16107.1	25412.2	785.798	1106.23	467.239
103.793	1894.78	718.664	0	0	0	39173.9	29128.1	26585.7	5936.24	2807.31	0	1925.64	833.234	2629.2	2502.34	5028.52	530.437	14621.3	20023.4	1543.9	3280.84	0
109.964	2416.23	103.74	49.917	0	0	48839.9	33411.4	24051.4	6041.58	7986.11	0	2827.75	1082.64	2513.73	2025.11	2094.04	257.336	11629.2	9302.08	0	1971.36	0
116.503	2488.76	411.536	0	0	157.238	42969.6	27922	25447.7	5444.07	3760.47	0	2806.95	1629.48	3097.27	3252.56	2501.9	473.948	12259.8	10264	2227.58	5186.22	1225.59
123.431	2594.2	0	0	79.8198	0	46588.8	26576.2	17579.1	3271.16	4885.59	0	2477.44	1781.92	3062.92	832.118	1284.08	287.113	8203.66	8250.15	2180.62	3005.69	0
130.771	1247.69	99.9085	0	0	0	35814.8	23506.6	16583.5	0	2407.06	0	1237.82	1762.52	2731.72	845.644	2583.12	74.4605	7156.39	9356.09	787.738	3004.26	403.331
138.547	1080.98	209.186	0	82.5766	0	27248.4	22528.9	13673.3	2057.87	2095.88	0	938.739	320.932	1782.22	1649.77	1300.35	240.836	5621.61	5888.7	3009.87	968.974	848.485
146.785	691.664	99.0773	0	0	0	30062.1	14388.6	12210.2	2792.69	2097.54	20987.8	1542.78	671.793	1924.55	446.648	0	220.546	4521.6	6256.73	9094.62	1074.01	0
