# Supplementary material for: Basin-Scale Underway Quantitative Survey of Surface Microplankton Using Affordable Collection and Imaging Tools Deployed From Tara
Source: Frontiers journal article supplement (doi:10.3389/fmars.2022.916025), 2022-07-05
Supplement: Table_4.XLSX [file Table_4.XLSX]

## Sheet: Feuil1
		station	date	lat	lon	sea surface temperature (°C)	salinity (psu)	chlorophyll a (mg m3)	O2 (mmg m3)	NO3 (mmg m3)	PO4 (mmg m3)	Si (mmg m3)	Fe (mmol m3)	PIC (mol m3)	pH
		2	2020-12-26	42.6217	-10.9003	14.3767	35.654	0.433134	250.296	1.56446	0.142612	1.24571	0.000290951	1.61644e-05	8.07538
color legend		3	2020-12-27	39.6503	-12.4008	16.4292	36.0133	0.215599	244.341	0.556963	0.0902472	1.19654	0.000232877	1.19978e-05	8.07366
		4	2020-12-28	36.429	-13.1392	17.6372	36.2524	0.205173	236.988	0.195879	0.0662866	1.38856	0.000251206	1.51855e-05	8.06288
TSG		5	2020-12-29	34.2833	-15.3817	18.6962	36.5554	0.130445	231.755	0.0775187	0.064163	1.57726	0.000159807	1.35729e-05	8.06685
ACS		6	2020-12-30	31.3667	-16.5933	19.7933	37.1639	0.128857	226.452	0.0444637	0.0613476	1.80447	0.000414596	2.56626e-05	8.05373
Mercator copernicus		7	2020-12-31	28.4767	-17.815	21.1003	36.9579	0.133382	222.85	0.00206225	0.0493927	1.41915	0.000547106	2.87368e-05	8.06318
Satellite		8	2021-01-02	23.8507	-20.7308	21.9732	36.7326	0.150863	223.994	0.168702	0.031657	1.34007	0.000458033	1.26356e-05	8.05637
		9	2021-01-03	21.6263	-22.2378	22.7165	37.1047	0.110305	221.606	0.14564	0.0244042	1.24103	0.00036266	1.24313e-05	8.05139
		10	2021-01-04	19.1773	-23.7302	22.9581	36.6009	0.122471	220.864	0.699563	0.0751293	0.942805	0.000133813	1.25494e-05	8.04891
		11	2021-01-09	13.8667	-27.2755	25.708	35.4441	0.122992	209.384	0.0023181	0.0238055	1.32235	0.000442843		8.06848
		12	2021-01-10	10.7217	-26.8817	26.6837	35.515	0.162918	205.943	0.0469779	0.0351146	1.83333	0.000446249		8.05093
		13	2021-01-11	7.61717	-26.4642	27.3874	35.3374	0.154199	204.714	0.0509375	0.0335461	1.74373	0.000400867		8.05088
		14	2021-01-12	4.63733	-26.2705	27.8883	35.1567	0.147082	203.467	0.0130664	0.0585925	1.9056	0.000331038	7.96288e-05	8.03157
		15	2021-01-13	2.1765	-26.211	27.9671	35.2448	0.0816159	198.514	0.01269	0.0490694	1.3201	0.000219987	2.66934e-05	8.05691
		16	2021-01-14	-0.653333	-27.1013	27.1488	35.8107	0.0694655	208.127	0.266484	0.126794	1.35839	0.000139385	2.26429e-05	8.01522
		17	2021-01-15	-3.3705	-28.2602	27.0461	36.4041	0.105073	207.673	0.0811031	0.151057	1.17016	5.46433e-05	1.21883e-05	8.00567
		18	2021-01-16	-6.037	-29.5517	27.6077	36.4309	0.0388725	202.329	0.00150447	0.133398	1.16992	4.78383e-05	2.63088e-05	8.01458
		19	2021-01-17	-8.491	-30.6247	27.6667	36.5725	0.016564	202.494	0.00170862	0.102459	1.21861	0.000127248	3.08991e-05	8.02696
		20	2021-01-18	-11.2993	-31.9842	27.6166	36.7221	0.0287818	202.504	0.00120563	0.0816781	1.21086	0.000209365	9.42649e-05	8.03743
		21	2021-01-19	-14.0982	-33.2603	27.2616	36.8711	0.0208359	203.268	0.00100767	0.0708544	1.15467	0.000236995	0.000107791	8.04326
		22	2021-01-20	-16.7233	-34.5328	27.4037	37.4971	0.137155	202.382	0.0015877	0.0860811	1.40663	0.000264404	4.84002e-05	8.04085
		23	2021-01-21	-18.9302	-36.1425	27.7328	37.3428	0.274764	202.281	0.00243637	0.0761988	1.49191	0.000694294	3.44287e-05	8.04312
		24	2021-01-22	-21.6243	-38.2693	27.7332	37.2871	0.116946	203.747	0.00367393	0.066852	1.60355	0.000612619	0.000131539	8.03579
		25	2021-01-24	-26.6393	-42.4048	26.7265	36.9028	0.0310768	205.378	0.00514514	0.078278	1.81105	0.000520962		8.03287
		26	2021-01-25	-29.3318	-44.709	25.2125	36.8914	0.0582851	211.541	0.00747145	0.0922161	1.41704	0.000249451		8.03279
		27	2021-01-26	-31.8672	-46.8815	23.7012	36.1528	0.0489607	221.849	0.00718379	0.118673	1.02775	5.89268e-05		8.04473
		28	2021-01-27	-33.9487	-48.7865	24.846	36.363	0.111845	214.64	0.00685005	0.106847	1.33107	0.000283366		8.04047
		29	2021-01-29	-37.3242	-53.3623	23.7075	34.3735	0.369435	227.148	0.313843	0.161073	1.20315	0.000219791		8.04609
		30	2021-01-30	-38.63	-55.87	19.4732	33.6284	0.217571	260.414	6.67955	0.746027	0.990975	0.000160479	0.000284737	8.05587
		31	2021-01-31	-40.4105	-58.9185	17.4238	33.6159	0.377399	256.611	4.32823	0.75036	1.59095	0.000322926	1.67626e-05	8.05679
		32	2021-02-01	-43.1452	-61.1635	16.561	33.5251	0.394351	259.834	3.5838	0.746473	1.36522	0.000318794	1.64938e-05	8.05515
		33	2021-02-02	-45.2598	-64.3212	17.0506	33.1472	0.524964	258.135	0.0227901	0.691034	1.30124	0.000438172	0.000287521	8.05401
		34	2021-02-03	-48.1313	-65.786	12.5395	32.8271	0.566939	277.954	3.63984	0.592814	1.15689	0.000852633	0.000992531	8.08169
		35	2021-02-04	-50.8833	-68.0167	12.2261	32.498	0.545461	289.679	2.01509	0.646187	1.43019	0.00100433	0.000455323	8.09236
